# Supplementary material for: Structural studies of the Enterococcus faecalis SufU [Fe-S] cluster protein
Source: PubMed Central journal article supplement (PMC2644719; doi:10.1186/1471-2091-10-3), 2009-02-02
Supplement: 1471-2091-10-3-S1.pdf [file 1471-2091-10-3-S1.pdf]

|                    | 10            | 20   | 30                    | 40       | 50        | 60                     | 70      | 80                             | 90            | 100 |
|--------------------|---------------|------|-----------------------|----------|-----------|------------------------|---------|--------------------------------|---------------|-----|
| Enterococcus       | MA            | LSK  | LDNLYRQVILDHSSHPHH    | HGTLDA   | SSQTIELNN | PTCGDVIELDVAIE         | DGV     | IKDIAFQGS                      | GCSISTASASMMT | DAV |
| Carnobacterium     | MA            | LTK  | LDQLYRQVILDHSSHPHH    | HGKLEQ   | STTQIELLN | PTCGDVLQLQLVVK         | DQV     | IKDIRFDGSGCTISQASASMMT         | DAV           |     |
| Lactococcus        | MA            | LSK  | LDNLYRAVILDHSSNPRH    | AGELQT   | G-CMVDLNN | PTCGDVIRLTVFEFE        | NDV     | ISNIAFSGHGCTISTASASMMTVAV      |               |     |
| Streptococcus      | MA            | LSK  | LNHLMAVVADHSKRPHH     | HGQLDG   | V-EAVQLNN | PTCGDVISLTVKFD         | EDK     | IEDIAFAGNGCTISTASSMMT          | DAV           |     |
| Lactobacillus      | MG            | LSK  | LNGLYREVILDYADHPHN    | KGELAT   | TTNAMTLHN | PTCGDTINLQVEVE         | DNK     | IKNIAFTGDCGTISQASASMMT         | DAV           |     |
| Leuconostoc        | MS            | LHN  | LDLLYRQTVMEYAQHPHH    | YKPMGLT  | ETYHVRKYN | PTCGDIIDLAFEMT         | DDK     | VTDIYFYGDGCAISKASASMMT         | DLV           |     |
| Lysinibacillus     | MS            | FNN  | LDQLYRSVIMDHYKNPRN    | KGSLEG   | EAVTIDMNN | PTCGDRIHLTLKVT         | DGV     | VEDAKFEGEGCSISMSSASMMT         | QLI           |     |
| Geobacillus        | MS            | SNHP | LDQLYRQVIMDHYKNPRN    | RGVLEG   | TNVDVMNN  | PTCGDRIHLTMKVE         | DGK     | VVDVKFEGEGCSISMSSASMMT         | QAI           |     |
| Bacillus           | MS            | FNN  | LDQLYRQVIMDHYKNPRN    | KGSLED   | GSLTVDMNN | PTCGDRIHLTMKVE         | DGK     | VTDAKFDGEGCSISMASASMMT         | QIV           |     |
| Exiguobacterium    | MD            | FNN  | LDHLYRQVIMDHYKTPRN    | RGALDG   | G-VTIDMNN | PTCGDTIRLQLAIE         | DDI     | VKDAKFDGEGCSISMASASMMT         | QAV           |     |
| Staphylococcus     | MN            | FNN  | LDQLYRSVIMDHYKNPRN    | KGVLDN   | GSMTVDMNN | PTCGDRIRLTFDIE         | DGI     | IKDAKFEFEGEGCSISMASASMMT       | QAV           |     |
| Paenibacillus      | MQ            | LDD  | LYRRVIMDHYKNPRN       | RGTLNT   | DAVTINLNN | PTCGDRISLQLQVE         | DGK     | VIDAKFSGEGCSISLSSASMMTEAV      |               |     |
| Symbiobacterium    | MN            | LSA  | LYQQVILDHYKKPRN       | KGAVER   | AVLKKHLHN | PTCGDDIEVQVSLGEDGR     | IDD     | VKWNRGCSISMASASMMSVAL          |               |     |
| Acholeplasma       | MD            | LKT  | LYRSVIMDHYKNPKN       | KGLINDS  | SYLTVHLNN | PTCGDDLIVQLLIK         | DSK     | IDLKQQKGCISCCASASVASELL        |               |     |
| Oenococcus         | MG            | LEG  | LNQLYRQVILDAVDQRY     | RGQLLN   | PTAVQLAHN | PNCGDVLELQIKVS         | DRH     | ITAIAFQGGCTISQASASILADLA       |               |     |
| Pediococcus        | MSN           | IQ   | ELYQKIIIVNHAKYPIG     | VGVLPQ   | YNYHAKLKN | PDCGDDIEVYLKVV         | DQH     | LEQISFTGQGCIIISQASASMMVDAL     |               |     |
| Peptostreptococcus | MD            | IR   | EIYTEIITEESRNTKN      | KRYLEH   | PTHEEKGN  | PSCGDEITLQLDIE         | DGI     | IKDASYVGVGCAISQASTSLMIDL       | LI            |     |
| Finegoldia         | ME            | LG   | SLYTELILEKSRDKSN      | RRELEH   | PTHCELGN  | PSCGDEITLQLKVQ         | DDT     | IEDIAYTGMGCAISQASTSIMCDVI      |               |     |
| Clostridium        | MD            | LN   | AIYTELIMEHSTSKHN      | KRNLDN   | PDIKEKGN  | PSCGDEITLKLKN          | NGV     | IEDLAFTGQGCIAISQASTSIMIDL      | LI            |     |
| Thermoanaerobacter | MSD           | LN   | QLYSEVIMEHYENSPH      | RRELKD   | ATHKERGN  | PLCGDDITLYLKMN         | GDI     | IEDASFTGHGCAISQASTSMIDL        | LI            |     |
| Coprococcus        | MQN           | NIQ  | NRNFYNEILTEHMRPEF     | KYDLPA   | ANVVEGVN  | PNCGDDIWLKLVKE         | NGV     | IEDGSFVGDGCAISQASADIMLGM       | I             |     |
| Nitrococcus        | MSD           |      | LRDLYQEVILDHNKHPRN    | FRSVEP   | HSHQADGYN | PLCGDRVTIQLSVEDG       |         | MIASIGFQGDGCAISTASASIMTEVL     |               |     |
| Nitrosococcus      | MSE           |      | LLDLYQEVILDHRKRPRN    | FHSMEN   | ADFQADGHN | PLCGDRVTVFLKMHNG       |         | IIEVVSFQEGGCAISIASASLMTESL     |               |     |
| Polaromonas        | MSD           |      | LRDLYQELIVDHYRHPHN    | FGPLAG   | ANRRAEGFN | PLCGDRLTLYLQVVDG       |         | VIENARFEGSGCAISTASASLMTDAL     |               |     |
| Coxiella           | MSD           |      | LNDLYHQLIIDHGRNPRH    | FGRLM    | PTHHEGYN  | PLCGDRLTVFFQEKNG       |         | VITDARFEGSGCAISMASASLMMEAL     |               |     |
| Myxococcus         | MSASD         |      | D-LKDLYQEVVLEHSHKRPRN | YRVVEG   | ATAEAAGHN | PLCGDQLVVTLKVEGG       |         | VIKDVAFQGGCAISKASASLMTGAV      |               |     |
| Stigmatella        | MSS           |      | E-LKDLYQEVVLDHGKRPRN  | FRAVEG   | ANHRAEGFN | PLCGDQLSVALKVEDG       |         | VIRDIGFQGGCAISRASASLMTGAV      |               |     |
| Anaeromyxobacter   | MSE           |      | LTDLYQEVVLDHGKRPRN    | YGLEG    | ATHRAEGLN | PLCGDRITVAARLEGG       |         | VVRDVRFEFGSGCAISKASASVMTGVA    |               |     |
| Thauera            | MSGMQ         |      | DSLRELYQEVIFDHNRP     | YRLLPA   | ANHHADGHN | PLCGDRLTVYLQVEDG       |         | IVRDAFVGHGCAISTASASLMTGAV      |               |     |
| Rickettsiella      | MMS           |      | HLRELYQEMILDHGRNPRH   | HHTMPL   | ANRLAHGFN | QICGDRLTLYLKDIDHG      |         | KIKAISFQSGCAIAIASASLMSEIL      |               |     |
| Methylococcus      |               |      | MED                   |          | ANRTVEGFN | PLCGDRITLYLVIDDAG      |         | VIRDVSFQGGCAISTASASLMTGAV      |               |     |
| Legionella         | MSM           |      | ELRELYQEIIDHNRP       | HHAMED   | ATTEAKGFN | PLCGDKLTVYLKIQD        |         | LIRDVSFQGGCAISQASASLMTDAL      |               |     |
| Dichelobacter      | MND           |      | LSDLYQELILDHKNPRN     | FHALTP   | CTHSATGHN | PLCGDNLKVTVRLNEG       |         | VIADLSFVGDGCAISKASASMMTELA     |               |     |
| Mariprofundus      | MFE           |      | LRDLYQQVIVDHNKSPRN    | FGKLAS   | FNHEADGYN | PLCGDKLHIYLVNSDDG      |         | IIEVVSFQEGGCAISVASASLMTDAL     |               |     |
| Psychromonas       | MND           |      | ELRALYQEVIIDHGRPRN    | SKKLEH   | PSCTQEGYN | PLCGDRLTLYLRIIDN       |         | RIIDASFQEGGCAISMAASSLMTERI     |               |     |
| Nitrospira         | MTT           |      | KSLYQEVILDHNRP        | YGKLDK   | ASHHAUGHN | PLCGDHLIDIDLNVEGK      |         | HIEGIAFHGESCAICKASASMMTTVV     |               |     |
| Rhodoferrax        | MSADP         |      | KALYQEVILDHNRP        | YGELDH   | PSHHAEGVN | PLCGDHIHVALDLKGD       |         | SVERIAFHGESCAICKASASMMTVAV     |               |     |
| Nitrosomonas       | MSL           |      | KSIYQEVILDHNRP        | YGALRS   | PTHHATGHN | PLCGDRIELDINMLDG       |         | HIEEIAFQGESCAICKASSMMTNAV      |               |     |
| Acidovorax         | MTGFTGNA      |      | ENELYQEVVLEHKRAPRN    | FGHLPQ   | PTHQAQGN  | PSCGDRIAVELQLQGG       |         | RVQDIRFTGQGCIAICMASTSMTEAV     |               |     |
| Burkholderia       | MNPAASHTVPDDA |      | QSTLYQELVVEHKRAPRN    | FGRLAE   | PTHEARGHN | QCGDLDLQVLRIEGG        |         | RIGDIRFDHGCAICIASASMMTEAV      |               |     |
| Acidiphilium       | MSGAAD        |      | VGDLYQRLIMERARAPLH    | AGRPAR   | FDAEAEGDN | PMCGDRVHLRLSC          |         | AGG-AIGEVDHETRGCAICVASADLMADAV |               |     |
| Gluconacetobacter  | MD            |      | QDGLYQROVIERARAPVH    | AGPLDG   | ATHQEGTN  | PMCGDRVRLGVTLDAA       |         | RVVMVRHQTRGCAICVASADMMADLA     |               |     |
| Thermosinus        |               |      | MYTEKVMDFHTNPRN       | VGEIEDAN |           | GIGEVGNACG DIMRIYLKIE  | NDI     | IKDVKFKTFGCGAAIATSSMVTEMV      |               |     |
| Desulfotobacterium |               |      | MYTEKVMDFHTNPRN       | VGEIEDAN |           | GVGEVGNACG DIMRIYLDVE  | GDI     | IKDVKFKTFGCGAAVATSSMVTEMV      |               |     |
| Heliobacterium     |               |      | MYTDKVMDFHTNPRN       | VGEIENAS |           | GVGEVGNASC DIMRIYLDVE  | DNI     | IKDVKFKTFGCGAAIATSSMVTELI      |               |     |
| Desulfotomaculum   |               |      | MYTEKVMDFHTNPRN       | VGEIENAD |           | GIGQVGNPSCG DIMKITLKVE | DNI     | IKDIKFKTFGCGAAVATSSMVTEMA      |               |     |
| Moorella           |               |      | MYSEKVMDFHTNPRN       | VGEIENAD |           | GVGQVGNPVCG DIMRLYIKVE | DGI     | IKDVKFKTFGCGAAIATSSMVTEMV      |               |     |
| Carboxydotherrus   |               |      | MMYSEKVMDFHTNPRN      | VGEIPDAD |           | GVGEVGNPSCG DIMRIYIKVD | GDK     | ITDVKFKTFGCGAAIATSSMVTEMV      |               |     |
| Halothermothrix    |               |      | MYSEKVMDFHTNPRN       | VGEIKDAD |           | AVGEVGNPVCG DIKLYLIKIK | DDT     | IEDIKFKTFGCGAAVATSSMVTELV      |               |     |
| Pelotomaculum      |               |      | MYSEKVIHFHTNPRN       | VGEIPDAD |           | GVGEIGNQVCGDITKIFIKVE  | DNV     | IKDIKFKTFGCGAAIASGSMTEMA       |               |     |
| Natranaerobius     |               |      | MYNEKVMDFHTNPRN       | VGEVESP  |           | GVGEVGNVTCG DIMRISIKVN | NNEEIED | IKFKTFGCGAAIATSSIVTEMA         |               |     |
| Anaerofustis       |               |      | MYNDIVLDHFHTNPRN      | VGVIEDAT |           | VVAKEASPCGDTTEFFLKDID  | DNDVITD | IKFRTFGCAAIAIASASMSTELI        |               |     |
| Desulfuromonas     |               |      | MYTDKVMDFHTNPRN       | VGQIENPN |           | VVVKVGDPGCGDAVLIFLKDID | DN      | VITDVKYKVGCGAAIATSSMASTMV      |               |     |
| Pelobacter         |               |      | MSFAHYSPKVFDFHTNPRN   | NGVLEDAN |           | GIGEIFDPECGDHLKVYVKIE  | DD      | IVKDIKFKQIKGCPAAIACASAMTELV    |               |     |
| Geobacter          |               |      | MAEIYSAKVVDHVRNPRN    | VGSLEDAN |           | VVVQAGDPTCGDAVLYFLRIE  | ED      | IVRDIKFKLIKCGAAIATSSVATELV     |               |     |
| Desulfococcus      |               |      | MIYSKVTMDHFRNPRN      | VGVLENAA |           | GVGEVGNP ICGDMMTIYLDIQ | DD      | RIADIKFQTFGCGSAIAVSSMLTELA     |               |     |
| Anaerotruncus      |               |      | MLYSKVDVLEHFANPHN     | VGEIENAD |           | GIGEVGNACG DIMKMYLKI   |         | KDGVIEDAKFKTFGCGAAIATSSMATDMI  |               |     |
| Faecalibacterium   |               |      | MASMYSAKVMHFANPHN     | VGELPDAN |           | GVGEVGNPKCG DIMRMYLKI  |         | ENNVIVDVKFLTFGCGAAIATSSMATDLI  |               |     |
| Anaerostipes       |               |      | MYSEKVMDFHEHPRN       | VGEIEGAS |           | GVGTVGNACG DIMRIYFDID  | DNQIIQD | VKFKTFGCGAAVATSSMATELV         |               |     |

Sequence alignment table showing protein sequences for various bacterial species, aligned by position (10-100). The sequences are color-coded by amino acid type. Species listed include Dorea, Ruminococcus, Alkaliphilus, Ehrlichia, Cowdria, Anaplasma, Wolbachia, Plesiocystis, Sorangium, Oceanospirillum, marine\_proteobac., Pseudomonas, Azotobacter, Colwellia, Moritella, Shewanella, Aeromonas, Pseudoalteromonas, Alteromonadales, alpha\_proteobac., Haemophilus, Pasteurella, Actinobacillus, Mannheimia, Neisseria, Vibrio\_cholerae, Vibrionales, Photobacterium, Shigella, Escherichia\_coli, Salmonella, Enterobacter, Klebsiella, Photorhabdus, Xenorhabdus, Serratia, Yersinia, Erwinia, Providencia, Buchnera, Janthinobacterium, Herminiimonas, Azoarcus, Thiobacillus, Ralstonia, Dechloromonas, Chromobacterium, Limnobacter, Bordetella, Polynucleobacter, Methylibium, Leptothrix, Delftia, Comamonas, Verminephrobacter, Methylobacillus, Methylophilales, and Acinetobacter.

```
      10      20      30      40      50      60      70      80      90     100
.....|.....|.....|.....|.....|.....|.....|.....|.....|.....|.....|.....|.....|.....|.....|.....|
Psychrobacter-----MAYSNQVIDHYENPRN-VGNLDKDAKNVGTGMVGAPACGDVMRLQIQVG-DDGIIEDARFKTYGCGSAIASSSLVTEWL
Candidatus-----MAYGEKVMDHYENPRN-VGVLDKDAKNVGTGMVGAPACGDVMRLQIQVD-DNGVIEDAKFKTYGCGSAIASSSLTEWV
Endoriftia-----MAYSDKVLDHYENPRN-VGAFDNEEKSVGTGMVGAPACGDVMRLQIKVN-DAGVIEDARFKTYGCGSAIASSSLTEWV
Magnetococcus-----MAYNEKVLDHYEKPRN-VGSMDKDADDVGTGMVGAPACGDVMKLQIKVD-DNGVIEDAKFKTFGCGSAIASSSLVTEWI
Magnetospirillum-----MAYSDKVIDHYEHPRN-VGALDKDDSAVGTGLVGAPACGDVMKLQIKVS-AEGIIEDAKFKTFGCGSAIASSSLVTEWV
Rickettsia-----MTMAYSKKVIDHYENPRN-VGSLDKENKNVGTGLVGAPACGDVMKLQIAVD-DDGIITDAKFKTFGCGSAIASSSLVTEWV
Neorickettsia-----MAYSDSVLNHYNNPRN-VGTIDKNKNVGTGLVGAPACGDVMRLQIEVD-NNGCIVDAKFKTFGCGSAIASSSLATEYL
```

|                    | 110                            | 120      | 130      | 140      | 150                                | 160               | 170             | 180                    | 190                  | 200        |
|--------------------|--------------------------------|----------|----------|----------|------------------------------------|-------------------|-----------------|------------------------|----------------------|------------|
| Enterococcus       | LGKTIAEATALAEDFSQLVQGN         | ---      | EVAED    | -EKLGD   | AAMLSGVA                           | -KFPARIK          | CATLAWKALEQAVA  | -----                  | NNGQGEAGHLHCEK       | -----      |
| Carnobacterium     | MGKTVSEALALADQFSLLVQGK         | ---      | DAPKL    | -EELGDA  | ALLNGVA                            | -KFPARIK          | CATLSWKALEKALV  | -----                  | EK                   | -----      |
| Lactococcus        | LGKTKEEAKELATIFSAMVTGE         | ---      | TDERQ    | -EKLGDA  | QFLAGVS                            | -KFPARVK          | CSTLAWNALKKAID  | -----                  | VGEAQET              | -VIHGE     |
| Streptococcus      | IGKSKEEALALADIFSEMVQGG         | ---      | ENPAQ    | -KELGDA  | EELLGVA                            | -KFPQRIK          | CSTLAWNALKEAIK  | -----                  | RSANAQHLTDQNVKEGKNV  | -----      |
| Lactobacillus      | KGKTTEEALAMAKTFSDMAIGKE        | -HSEADL  | -DQLGD   | ARILTSIM | -EFPARIK                           | CATLSWWALQALL     | -----           | KDSEEEENNE             | -----                |            |
| Leuconostoc        | LGQRREAVATLLEEFskLTRG          | ---      | EVADT    | -KLLGEA  | QILAGVT                            | -KFPTRIK          | CATLAWHALDELIS  | -----                  | VEK                  | -----      |
| Lysinibacillus     | KGKKVDEALELADIFSKMMGE          | ---      | EYSDK    | -YLEDVE  | ALQGV                              | -QFPARIK          | CATLAWKAMEKG    | -----                  | VK                   | -----      |
| Geobacillus        | KGKTVEEALRLAHIFSDMIQGK         | ---      | EYDSS    | -VDLGD   | IEALQGV                            | -KFPARIK          | CATLAWKALEKG    | -----                  | LHNHEHEGR            | -----      |
| Bacillus           | KGKDVESALKLSEVFSNMVQGG         | ---      | EYDED    | -IDLGD   | IEALQGV                            | -KFPARIK          | CATLAWKAMEKG    | -----                  | VKEGQ                | -----      |
| Exiguobacterium    | KGKTVEEALQLANVFSEMVQGG         | ---      | DYDEK    | FDLGD    | EALSGVT                            | -KFPARIK          | CATLAWKALERG    | -----                  | VEEGK                | -----      |
| Staphylococcus     | KGHSLGEAMQMSQEFTKMMLGE         | ---      | DYVIT    | -EEMGD   | IEALQGV                            | -QFPARIK          | CATLAWKALEKGTV  | -----                  | AKEGKAEGTTEEE        | -----      |
| Paenibacillus      | KGKTYEEALGLAERFSGLMKGE         | ---      | DVDFE    | -ENED    | IEALSGVN                           | -KFPARIK          | CATLAWNALRKG    | -----                  | IEQKQV               | -----      |
| Symbiobacterium    | KGKTLAEAQELMQSFYRMIQGE         | ---      | QGNKY    | -ALGEI   | QALSGVS                            | -KFPVRIK          | CATLAWHCLIEGIR  | -----                  | EYEGGDANG            | -----      |
| Acholeplasma       | KNKDIFEAKELIQTFYDMLTGE         | ---      | EIKDKS   | -VLEDAL  | AFEGVG                             | -QFPARIK          | CATLAWKAYEKGLN  | -----                  | PLEGEQNE             | -----      |
| Oenococcus         | LHQSLQSMQTRISQFQKMITGK         | ---      | ESVEI    | -DQLGD   | ASVFSKIS                           | -QFPTRVK          | CAGLVWDALEQMLK  | -----                  | NN                   | -QFD       |
| Pediococcus        | SGKRILEAQQLMNFQNLILG           | ---      | KDYDE    | -SQLGD   | LIAFATLN                           | -QFPTRVK          | CGMLAWHAMADGLN  | -----                  | QGGISFGK             | -----      |
| Peptostreptococcus | KGKTLDEAKELCEFTFLAMIT          | -E       | -GLEGDEL | -KKLKDA  | IALQNIS                            | -TMPARVK          | CAVLAWHTLKNILE  | -----                  | AN                   | -----      |
| Fingoldia          | KGKSVNEAIDLCKNFISMIKGE         | -ITDRKEL | -KVLKDA  | AVCFQNIS | -TLPARVK                           | CAVLAWHTLKDML     | -----           | NDKSEGSFIPD            | -----                |            |
| Clostridium        | KGKNIEEALKLTETFIGMIKRE         | -IKDDEEL | -YALEDA  | MAFKNIS  | -NMPARVK                           | CAVLAWHTLKEALE    | -----           | K                      | -----                |            |
| Thermoanaerobacter | KGKDKKEALRLVQEFIDMIH           | ---      | KKDVNL   | -DELGD   | AQVLHGVS                           | -DFPARVK          | CALLAWKTLQEIL   | -----                  |                      | -----      |
| Coprococcus        | IGKTKEEALKLGLFLKMIQGG          | ---      | EATDEEI  | -DQLEE   | ASALKDIA                           | -HMPARVK          | CAVLGWHITLLEALK | -----                  | NIS                  | -----      |
| Nitrococcus        | EGKTVDEAQAQFDQFHDLVTRDEACPEA   | ---      | ALGKIA   | VLAGVR   | -DYPMRVK                           | CATLAWHTLHAALT    | -----           | EKDEVTE                | -----                |            |
| Nitrosococcus      | KGKSSQEAEGFLGKFDLVTDESTHREEG   | ---      | LSLGL    | GLVLAGVK | -AFPMPRVK                          | CATLAWHTLHAALA    | -----           | HENKMATTE              | -----                |            |
| Polaromonas        | KGKTEETEVENLFASFHALVAGGSDSPS   | -T       | -VALGK   | LEVLAVGR | -EFPVVRVK                          | CATLAWHTLRAALR    | -----           | EVSQPVSTE              | -----                |            |
| Coxiella           | KGKSIQAAEILFSQFHDLVTG          | ---      | TKRE     | -T       | -AQLGK                             | LAVLAGVA          | -EYPARVK        | CATLAWHTLRAALH         | -----                | HNTTTLVKTE |
| Myxococcus         | KDRTRAEEADLFERVHKLVTGEPESVD    | -V       | -DALGK   | LAVLSGVS | -EFPARVK                           | CASLAWHTLRAALE    | -----           | GRGEAVSTE              | -----                |            |
| Stigmatella        | KDKTCEEAEMLFARVHQLVTEGPAEVD    | -T       | -EALGK   | LTVLSGVS | -EFPARVK                           | CASLAWHTLRAALH    | -----           | EEPEPVSTE              | -----                |            |
| Anaeromyxobacter   | KGRTPAEIDAVFERFHRVTEGPGAVD     | -A       | -GQLGK   | LAVFGGVH | -EYPTRVK                           | CASLAWHALRQALR    | -----           | GGGEAVSTE              | -----                |            |
| Rhauera            | KGKPVAAEVEALFRDVHALLTEGREATDPA | ---      | RDFGK    | LEVLAVGR | -EFPARVK                           | CATLAWHTLHNLV     | -----           | GEHETAHTE              | -----                |            |
| Rickettsiella      | SGKTCKEAETCFERFHQLLTRELTTAEQL  | ---      | QDLEK    | LAVFAGVK | -AYPARVK                           | CATLAWHTLLAALK    | -----           | QNSILVSTESSLLSYDHTLSAE | -----                |            |
| Methylococcus      | RNMHESEAHALFETFHRMATG          | ---      | DDAVNL   | ---      | EELGK                              | LAVLAGVR          | -AYPARVK        | CATLAWHSLAAL           | -----                | NQETTVTTE  |
| Legionella         | KGKSIKEAHELFHRVHRMLTQE         | ---      | EEDSL    | ---      | VSMDK                              | LTVLAGVK          | -AFPMPRVK       | CATLAWHTLEAALN         | -----                | KETEIVVKTE |
| Dichelobacter      | MGKTLLEEFQKLYDLFHYIATTONPIQGE  | ---      | VGKLQ    | ALAGVR   | -QYPARVK                           | CATLAWHTLDAALH    | -----           | HKNLVKTE               | -----                |            |
| Mariprofundus      | KGTELAAFQQRFEQFQHMVTADIDEEDT   | ---      | DVLGK    | LAVLSGVR | -EFPSPRIK                          | CASLAWHTMKAAL     | -----           | DSGKAATE               | -----                |            |
| Psychromonas       | KNMTVTEARQLFTAFQNLVTQ          | ---      | AEPDN    | IREYLG   | KLSVLGGVR                          | -DFPVRVK          | CATLAWHTLHAALN  | -----                  | NTKQIVSTE            | -----      |
| Nitrosospira       | KGKSLGDAEMLIKEFRDMATGALDLAH    | -P       | -HHLGR   | LTVFAGVR | -DLPTRVK                           | CAILPWHITLHAALN   | -----           | SVSTTSTEAEDDPMHAAIGDA  | -----                |            |
| Rhodoferrax        | KGKSAIEAKTLIHEFVDMATGRIAAKD    | -S       | -PHIGR   | LAVFSGIS | -ELPMRVK                           | CAILPWHITLQAAFN   | -----           | AEPSASTEAEADPMHTPLGDA  | -----                |            |
| Nitrosomonas       | KGKSHQEAELIQEFREMLVSGEDKS      | ---      | F        | -DHLGR   | LKVLAVGR                           | -DLPTRVK          | CAILPWHITLHAAMN | -----                  | STDSATTEADHASKLVANNH | -----      |
| Acidovorax         | KGKEVAAAQALQQHFR               | ---      | AVLTG    | QAVHDE   | ---                                | APLGK             | LVSLAVGR        | -QYPSRIK               | CALLGWHALHAIA        | -----      |
| Burkholderia       | IGRDVEAARELQQRF                | ---      | AVLTG    | QAVHDE   | ---                                | ASLGK             | LESLAVQ         | -RYPRIK                | CALLGWHALHAIA        | -----      |
| Acidiphilium       | AGRSRAAAEELADAFEMVATG          | ---      | AVPDRED  | ---      | FSELRA                             | LSGVH             | -EYRSRHR        | CATLAWHTLQALRAALT      | -----                | KTMETGHGG  |
| Gluconacetobacter  | PGRSVAELGVLSTRAFDMRLRTGGDAPN   | ---      | PELAT    | FAGLH    | -RHRSRIR                           | CATLAWHTLQALRAALT | -----           | ESKEG                  | -----                |            |
| Thermosinus        | KGKTIDEALKIS                   | -----    | NQAVA    | EALGGL   | PAPAKMHCSNLAADALHEAIKDYLNKKGK      | -----             |                 |                        | -----                |            |
| Desulfotobacterium | KGKTIEEALKIT                   | -----    | NAAVA    | EALDGL   | PAPAKMHCSNLAADALHEAIKDYLNKKGK      | -----             |                 |                        | -----                |            |
| Heliobacterium     | KGKTIDEALGLT                   | -----    | NRAVA    | DALGGL   | PAPAKMHCSNLAADALHEAIKDYLNKKGK      | -----             |                 |                        | -----                |            |
| Desulfotomaculum   | MGKTIDEALTIT                   | -----    | NKAVA    | EALGGL   | PAPAKMHCSNLAADALHEAIKDYLNKKGK      | -----             |                 |                        | -----                |            |
| Moorella           | KGKTVEEALKIS                   | -----    | NAAVA    | EALDGL   | PAPAKMHCSNLAADALHEAIKDYLNKKGK      | -----             |                 |                        | -----                |            |
| Carboxydotherrhus  | KGKTIEEAMKIT                   | -----    | NKAVA    | DALDGL   | PAPAKMHCSNLAADALHEAIKDYLNKKGK      | -----             |                 |                        | -----                |            |
| Halothermothrix    | KGKKIDEALKVS                   | -----    | KEITVA   | EALDGL   | PSNKMHCNLAADALHEAIKDYLNKKGK        | -----             |                 |                        | -----                |            |
| Pelotomaculum      | KGKTIEEALQIT                   | -----    | NKHVA    | DMLGGL   | PAPAKMHCSNLAADALHEAIKDYLNKKGK      | -----             |                 |                        | -----                |            |
| Natranaerobius     | KGKHINEARDIK                   | -----    | NKDVA    | DELDEL   | GLPKNKLHCNLAADALHEAIKDYLNKKGK      | -----             |                 |                        | -----                |            |
| Anaerofustis       | KGKTVEEARKIT                   | -----    | NKMVV    | DSLGL    | PAPAKMHCSNLAADALHEAIKDYLNKKGK      | -----             |                 |                        | -----                |            |
| Desulfuromonas     | EGKTLLEAEVLT                   | -----    | DEKVA    | EALGGL   | PDSPMHCSNLAADALHEAIKDYLNKKGK       | -----             |                 |                        | -----                |            |
| Pelobacter         | MGKPVGEAMLVS                   | -----    | DDQII    | EYIDGL   | PEFKVHCSALGASGFRVAVMDYSIKSKLFGATEG | -----             |                 |                        | -----                |            |
| Geobacter          | MGKGLDEVMLGS                   | -----    | DQIIA    | QALDGL   | PEEKMHCNMAASALHAAVEQY              | -RATVAGETKPL      | -----           |                        | -----                |            |
| Desulfococcus      | KGKTLLEAKKIT                   | -----    | NKDVA    | EALGGL   | PKNKLHCNLAADALHEAIKDYLNKKGK        | -----             |                 |                        | -----                |            |
| Anaerotruncus      | KGSTIEDALKLS                   | -----    | NKAVV    | EALDGL   | PASKIHCNLAADALHEAIKDYLNKKGK        | -----             |                 |                        | -----                |            |



|                         | 110                                                                     | 120         | 130   | 140 | 150          | 160          | 170                 | 180        | 190                                  | 200       |       |
|-------------------------|-------------------------------------------------------------------------|-------------|-------|-----|--------------|--------------|---------------------|------------|--------------------------------------|-----------|-------|
|                         | ..... ..... ..... ..... ..... ..... ..... ..... ..... ..... ..... ..... |             |       |     |              |              |                     |            |                                      |           |       |
| <b>Acinetobacter</b>    | <b>KGKTLDEAQA</b>                                                       | <b>IK</b>   | ----- |     | <b>NIDIA</b> | <b>TELA</b>  | <b>LPPVKVHCSVLA</b> | <b>EDA</b> | <b>IKAAIEDYRSKKS</b>                 | <b>KA</b> | ----- |
| <b>Psychrobacter</b>    | <b>KGKTLDQASE</b>                                                       | <b>EIK</b>  | ----- |     | <b>NKHIA</b> | <b>EELA</b>  | <b>LPPVKVHCSVLA</b> | <b>EDA</b> | <b>IKAAIEDYRAKSGTVEA</b>             |           | ----- |
| <b>Candidatus</b>       | <b>KGKTLNEAAE</b>                                                       | <b>EIK</b>  | ----- |     | <b>NSDIA</b> | <b>EELS</b>  | <b>LPPVKIHCSVLA</b> | <b>EDA</b> | <b>IKAAINDIKS</b>                    | <b>KA</b> | ----- |
| <b>Endoriftia</b>       | <b>KGKTLDEAQQ</b>                                                       | <b>IK</b>   | ----- |     | <b>NSEIA</b> | <b>EELA</b>  | <b>LPPVKVHCSVLA</b> | <b>EDA</b> | <b>IKAAIKDYTDKNAG</b>                |           | ----- |
| <b>Magnetococcus</b>    | <b>KGKTIDEAL</b>                                                        | <b>TIK</b>  | ----- |     | <b>NKDVA</b> | <b>EELA</b>  | <b>LPPVKVHCSVLA</b> | <b>EDA</b> | <b>IKAAVKDYREKQOKKGA</b>             |           | ----- |
| <b>Magnetospirillum</b> | <b>KGKTLDEAAS</b>                                                       | <b>IK</b>   | ----- |     | <b>NTDIA</b> | <b>QELA</b>  | <b>LPPVKIHCSVLA</b> | <b>EDA</b> | <b>IKAAIADYKKKSG</b>                 |           | ----- |
| <b>Rickettsia</b>       | <b>KGRSVEDAET</b>                                                       | <b>IK</b>   | ----- |     | <b>NTEIA</b> | <b>KELS</b>  | <b>LPPVKLHCSLLA</b> | <b>EDA</b> | <b>IKAAIADYKQKESKKS</b>              | <b>D</b>  | ----- |
| <b>Neorickettsia</b>    | <b>IGKSIEEA</b>                                                         | <b>EKIK</b> | ----- |     | <b>NTEIA</b> | <b>ASTLC</b> | <b>LPPIKMHCSMLA</b> | <b>EDA</b> | <b>IKAAIKDFREKQVTSSTEEAGNENTENKS</b> |           | ----- |
